# Supplementary material for: Charge Storage and Solar Rechargeable Battery Devices Based on Electrodes Electrochemically Modified with Conducting Polymer Nanowires
Source: MDPI journal article supplement (doi:10.3390/polym13244375), 2021-12-14
Supplement: s1 [file s1]

## SUPPLEMENTARY INFORMATION

# Charge Storage and Solar Rechargeable Battery Devices Based on Electrodes Electrochemically Modified with Conducting Polymer Nanowires

Andrés Mauricio Ramírez <sup>1</sup>, Manuel Alejandro Gacitúa <sup>2</sup>, Fernando Raúl Díaz <sup>3</sup> and María Angélica del Valle <sup>3,\*</sup>

<sup>1</sup> Laboratorio de Electroquímica y Materiales Aplicados, Centro de Nanotecnología Aplicada, Facultad de Ciencias, Universidad Mayor, Camino La Pirámide 5750, Huechuraba-Santiago 8580745, Chile; andres.ramirez@umayor.cl

<sup>2</sup> Facultad de Química y Biología, Universidad de Santiago de Chile, Av. L.B. O'Higgins 3363, Santiago 7254758, Chile; manuel.gacitua@usach.cl

<sup>3</sup> Laboratorio de Electroquímica de Polímeros, Pontificia Universidad Católica de Chile, Av. V. Mackenna 4860, Macul, Santiago 7820436, Chile; fdiaz@uc.cl

\* Correspondence: mdvalle@uc.cl

Figure S1

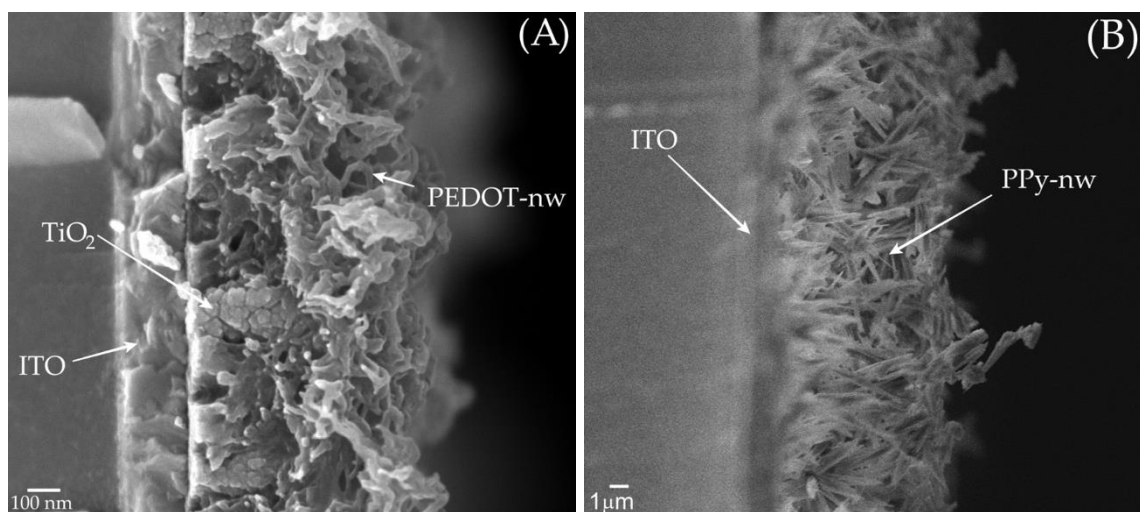

**Figure S1** SEM micrograph of (A) ITO|TiO<sub>2</sub>|PEDOT-nw and (B) ITO|PPy-nw.

Figure S2

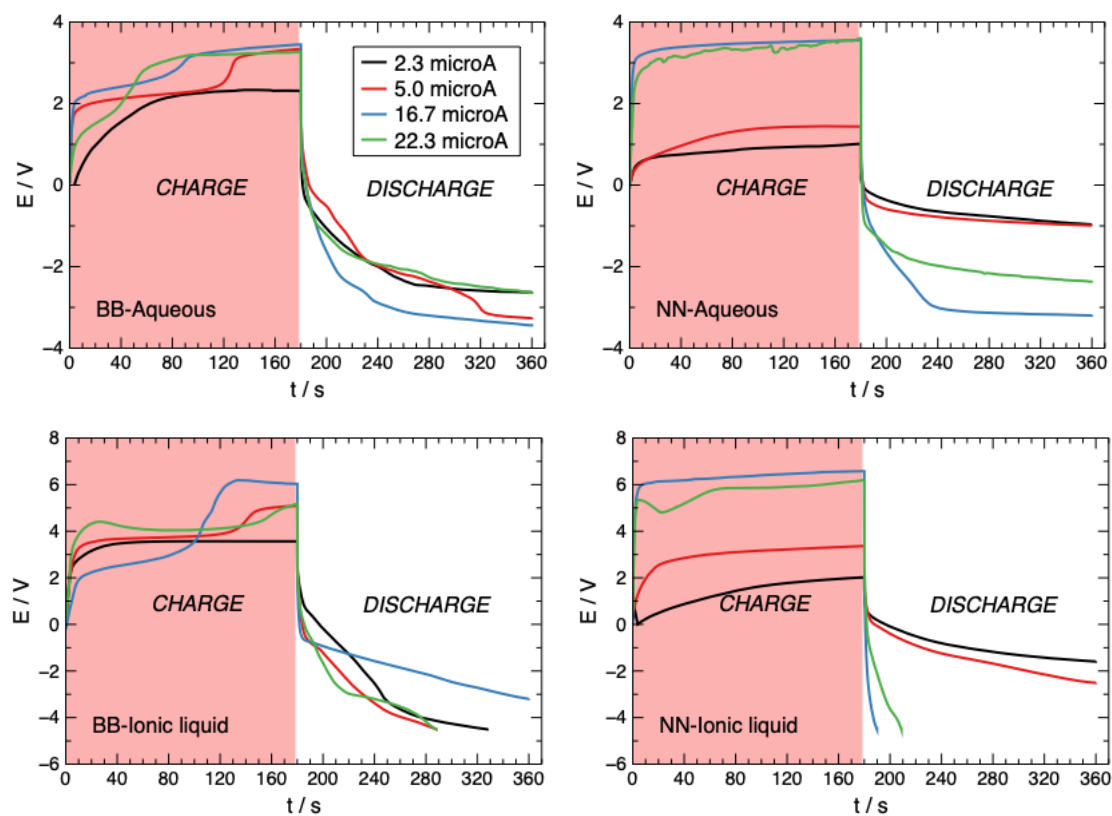

**Figure S2.** Single-step  $E/t$  charge/discharge transients registered at different charge currents in aqueous and ionic liquid media.

Figure S3

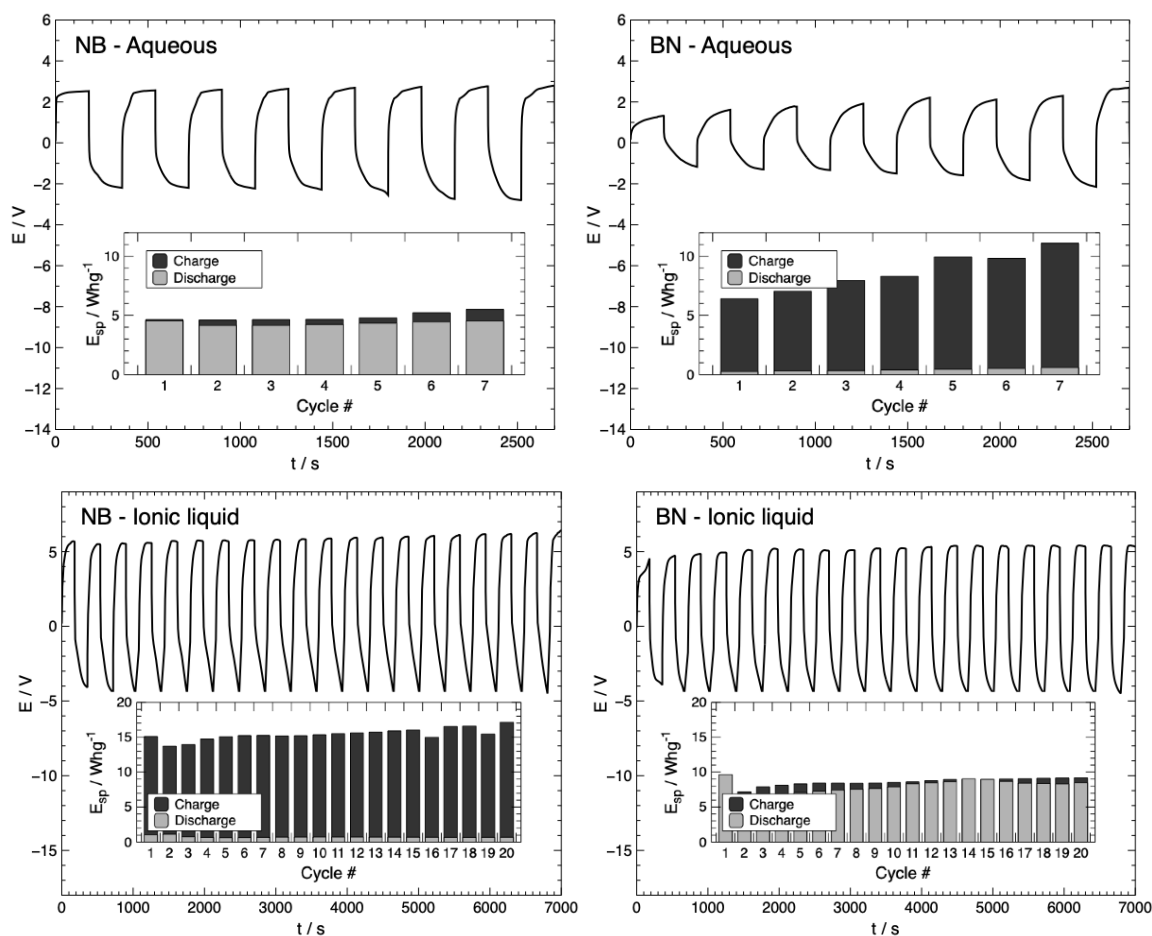

**Figure S3.** Multiple-steps E/t charge/discharge transients registered at  $\pm 5 \mu\text{A}$  for nano-nulk (NB) and bulk-nano (BN) electrode configuration in different media. Insert: Energy density calculated for each charge/discharge cycle.

Figure S4

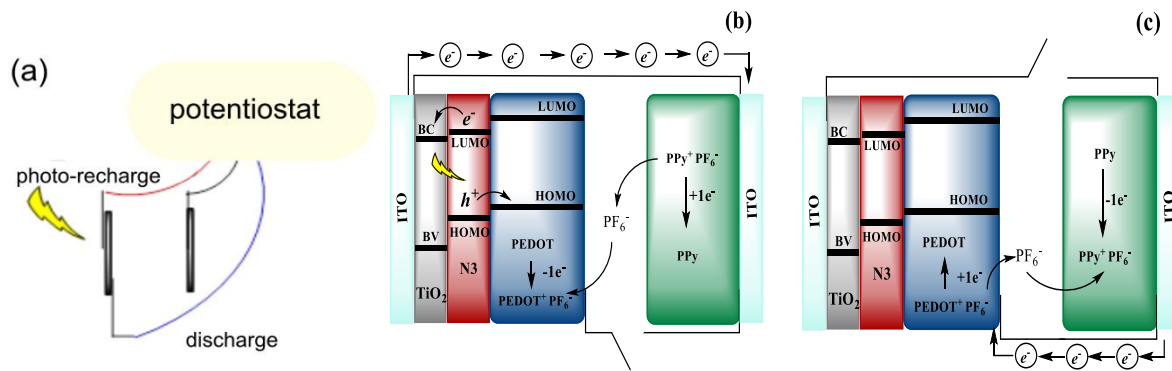

**Figure S4.** Configuration (a) and operating mechanisms of ITO|TiO<sub>2</sub>|N3|PEDOTnw|Ppyw|ITO solar-energy-rechargeable battery during photocharge (b) and discharge (c) processes.
